# Supplementary material for: Critical Assessment of a Structure-Based Screening Campaign for IDO1 Inhibitors: Tips and Pitfalls
Source: Int J Mol Sci. 2022 Apr 2;23(7):3981. doi: 10.3390/ijms23073981 (PMC8999677; doi:10.3390/ijms23073981)
Supplement: Supplementary file 1 [file ijms-23-03981-s001.zip › ijms-1653968-supplementary.pdf]

## Table of Contents:

**Figure S1.** Binding site properties of the catalytic cleft in the IDO1 structure 6AZW. Solvent accessible surfaces are generated with SiteMap and color-coded according to total area (grey surface), hydrogen bond acceptor area (red surface), hydrogen bond donor area (violet surface), hydrophobic area (yellow surface).

**Figure S2.** Binding site properties of the catalytic cleft in the IDO1 structure 6E45. Solvent accessible surfaces are generated with SiteMap and color-coded according to total area (grey surface), hydrogen bond acceptor area (red surface), hydrogen bond donor area (violet surface), hydrophobic area (yellow surface).

**Figure S3.** Binding site properties of the catalytic cleft in the IDO1 structure 6E46. Solvent accessible surfaces are generated with SiteMap and color-coded according to total area (grey surface), hydrogen bond acceptor area (red surface), hydrogen bond donor area (violet surface), hydrophobic area (yellow surface).

**Figure S4.** Histograms showing the distribution of Gscore values for the successfully docked ligands in each IDO1 structure (**a**, 6AZW; **b**, 6E45; **c**, 6E46).

**Figure S5.** Single point assay of MST binding experiments of virtual hit compounds (set A) from IDO1 structure 6AZW. The blue filled circle shows the positive control (concentration of 250  $\mu$ M), the green filled circle shows negative control (buffer vehicle).

**Figure S6.** Single point assay of MST binding experiments of virtual hit compounds (set B) from IDO1 structure 6E45. The blue filled circle shows the positive control (concentration of 250  $\mu$ M), the green filled circle shows negative control (buffer vehicle).

**Figure S7.** Single point assay of MST binding experiments of virtual hit compounds (set C) from IDO1 structure 6E46. The blue filled circle shows the positive control (concentration of 250  $\mu$ M), the green filled circle shows negative control (buffer vehicle).

**Figure S8.** Chemical structures of n.13 binders from IDO1 structure 6AZW.

**Figure S9.** Chemical structures of n.17 binders from IDO1 structure 6E45.

**Figure S10.** Chemical structures of n.5 binders from IDO1 structure 6E46.

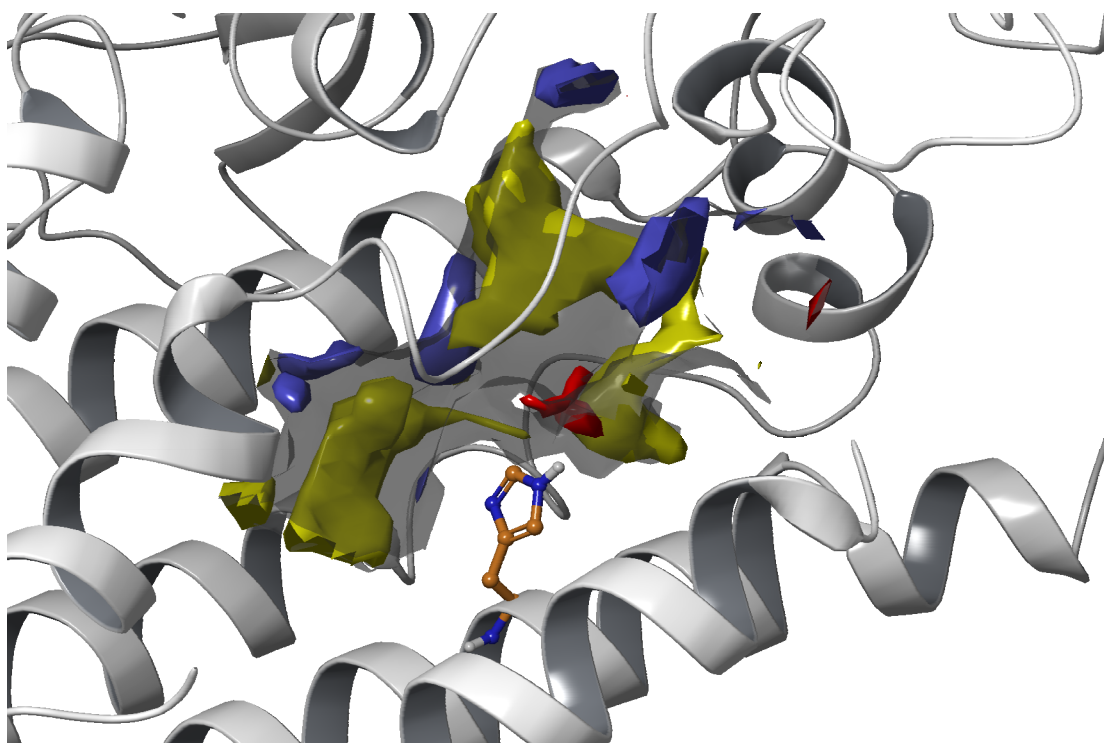

**Figure S1.** Binding site properties of the catalytic cleft in the IDO1 structure 6AZW. Solvent accessible surfaces are generated with SiteMap and color-coded according to total area (grey surface), hydrogen bond acceptor area (red surface), hydrogen bond donor area (violet surface), hydrophobic area (yellow surface).

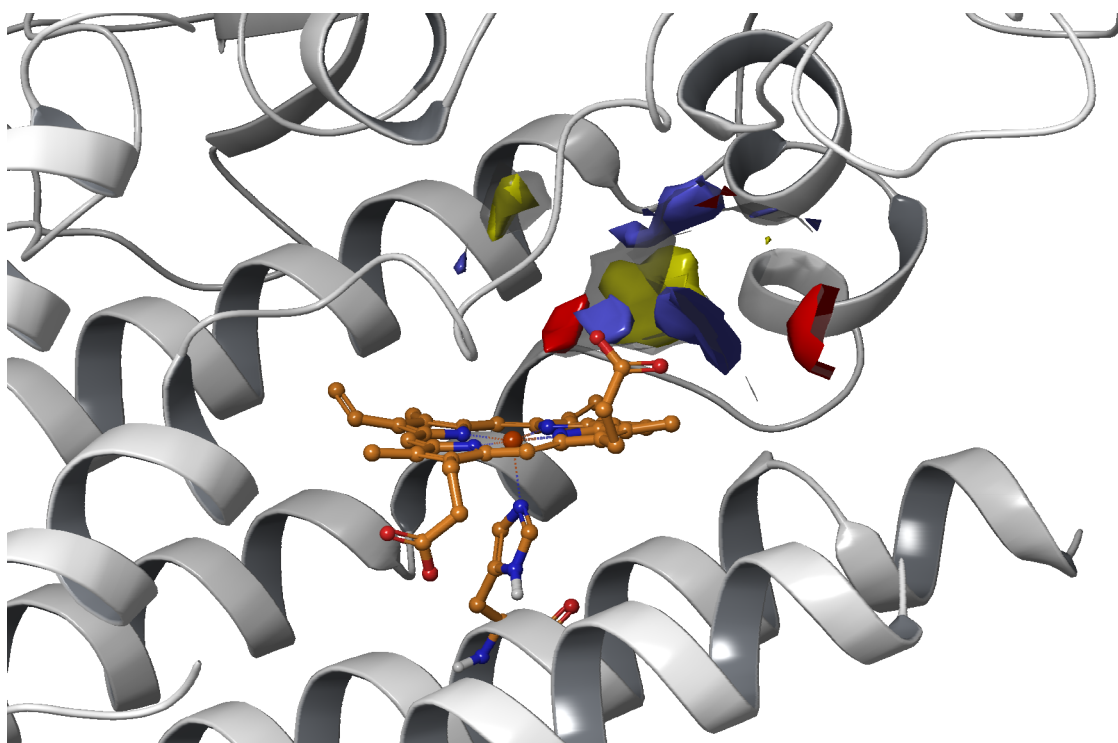

**Figure S2.** Binding site properties of the catalytic cleft in the IDO1 structure 6E45. Solvent accessible surfaces are generated with SiteMap and color-coded according to total area (grey surface), hydrogen bond acceptor area (red surface), hydrogen bond donor area (violet surface), hydrophobic area (yellow surface).

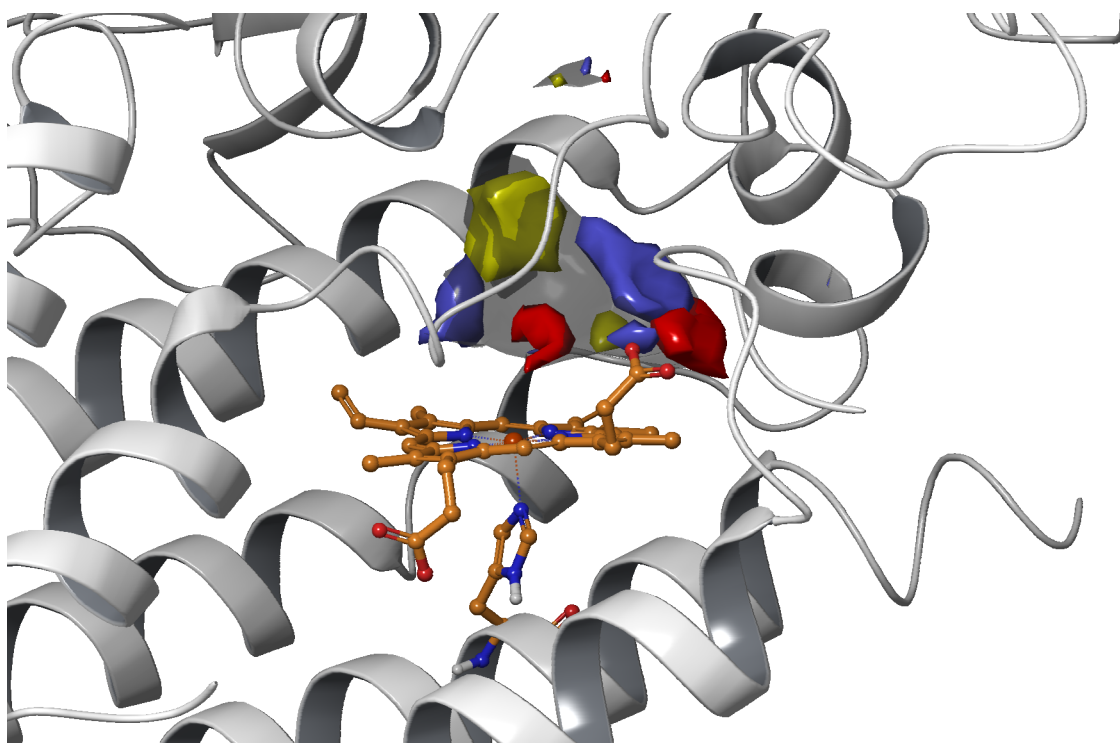

**Figure S3.** Binding site properties of the catalytic cleft in the IDO1 structure 6E46. Solvent accessible surfaces are generated with SiteMap and color-coded according to total area (grey surface), hydrogen bond acceptor area (red surface), hydrogen bond donor area (violet surface), hydrophobic area (yellow surface).

**a**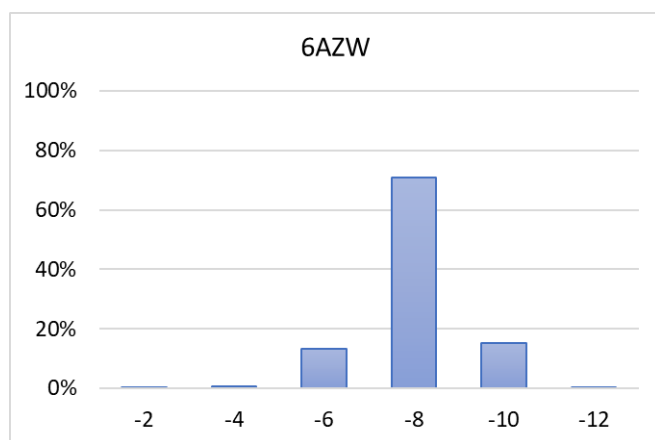**b**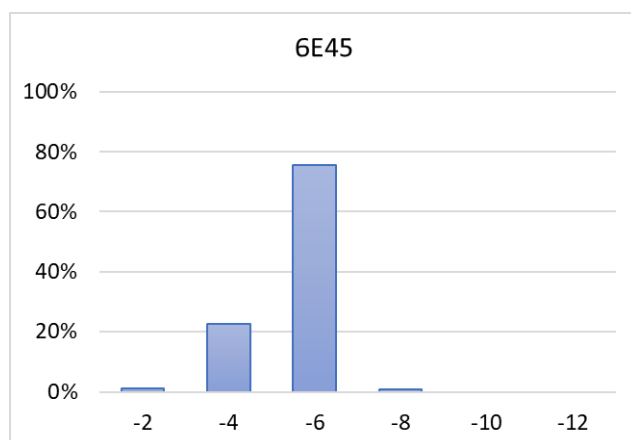**c**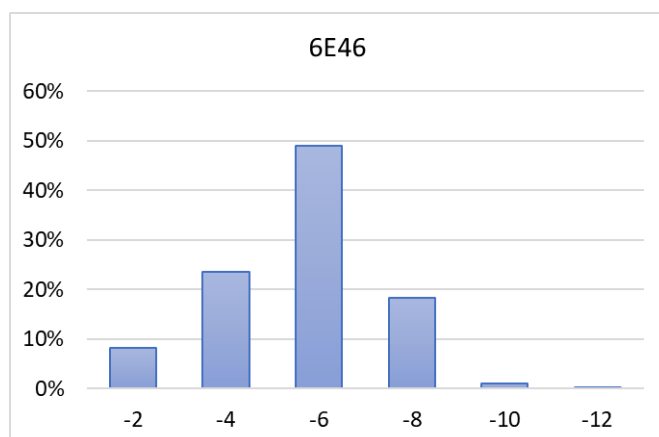

**Figure S4.** Histograms showing the distribution of Gscore values for the successfully docked ligands in each IDO1 structure (**a**, 6AZW; **b**, 6E45; **b**, 6E46).

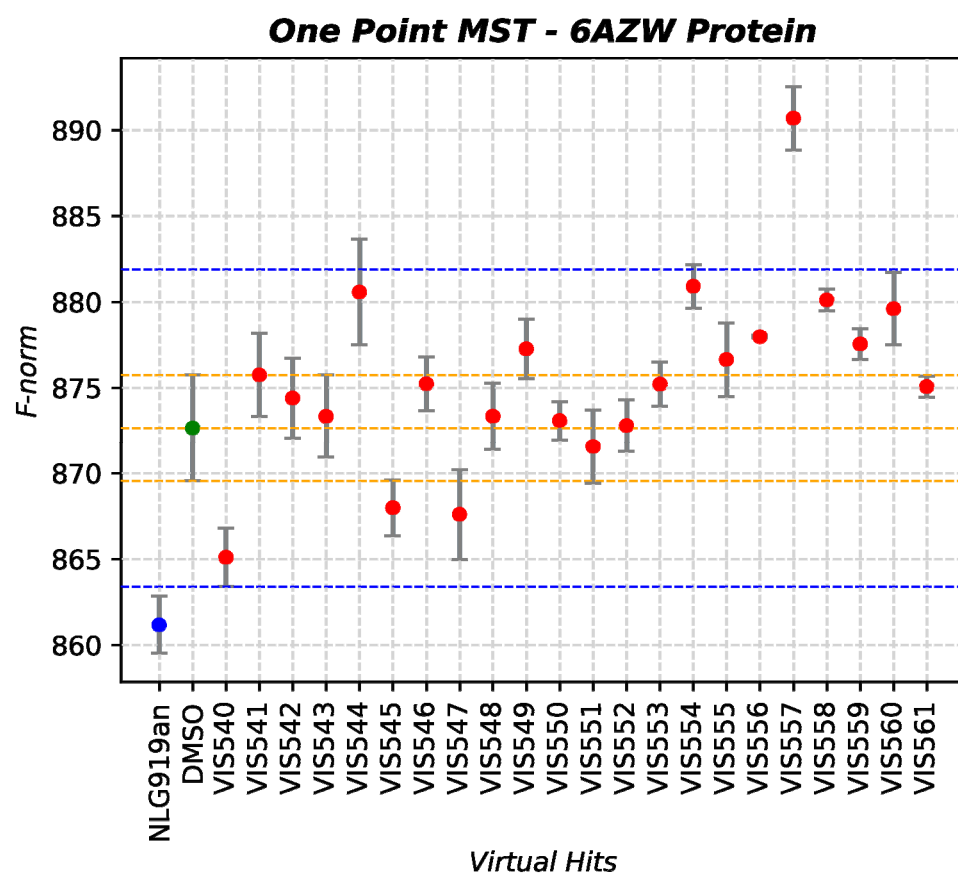

**Figure S5.** Single point assay of MST binding experiments of virtual hit compounds (set A) from IDO1 structure 6AZW. The blue filled circle shows the positive control (concentration of 250  $\mu$ M), the green filled circle shows negative control (buffer vehicle).

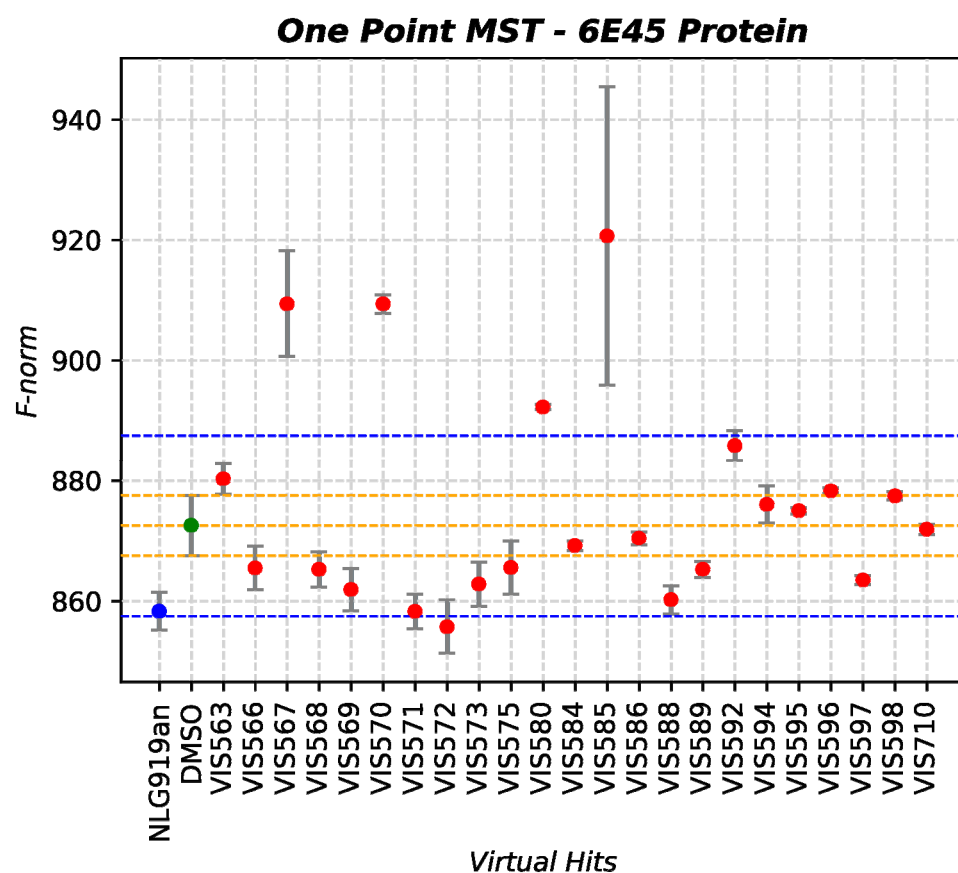

**Figure S6.** Single point assay of MST binding experiments of virtual hit compounds (set B) from IDO1 structure 6E45. The blue filled circle shows the positive control (concentration of 250  $\mu$ M), the green filled circle shows negative control (buffer vehicle).

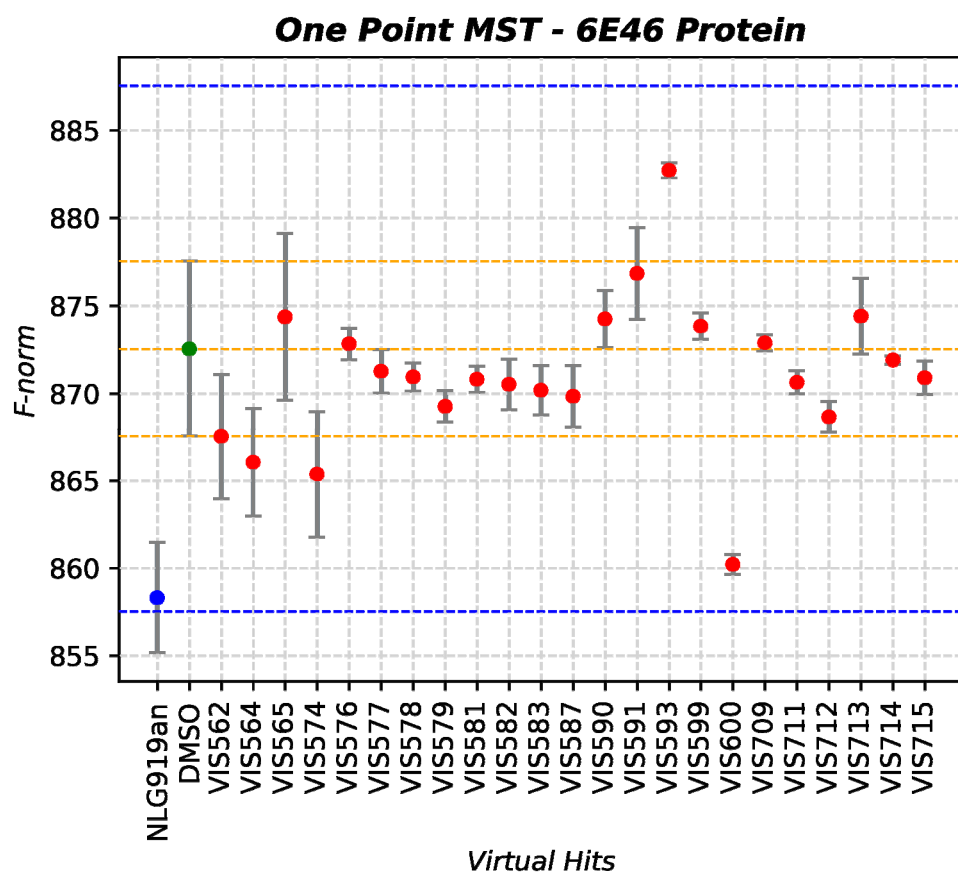

**Figure S7.** Single point assay of MST binding experiments of virtual hit compounds (set C) from IDO1 structure 6E46. The blue filled circle shows the positive control (concentration of 250  $\mu$ M), the green filled circle shows negative control (buffer vehicle).

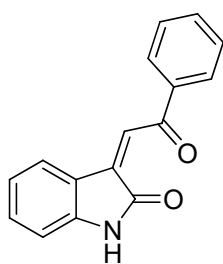

VIS540 (16)

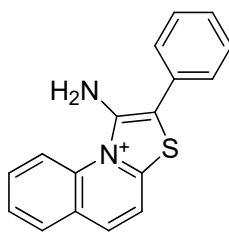

VIS541

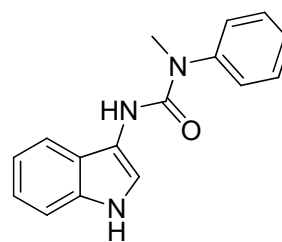

VIS544 (17)

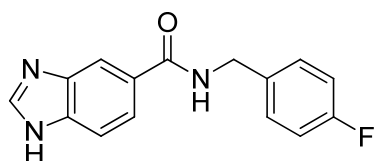

VIS545

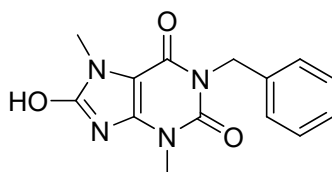

VIS546

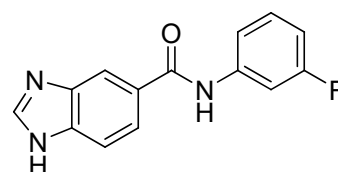

VIS547

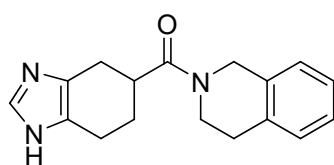

VIS549

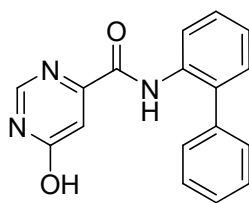

VIS554

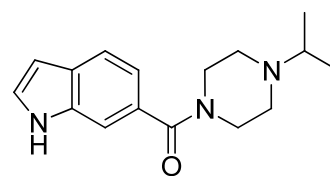

VIS555

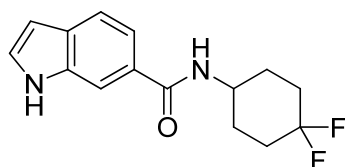

VIS557 (18)

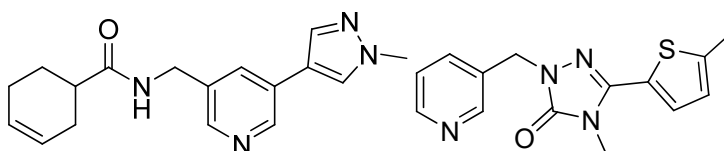

VIS558

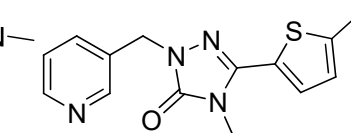

VIS559

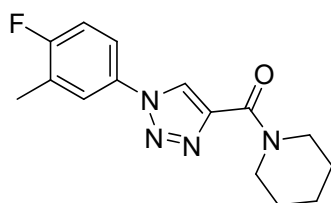

VIS560

**Figure S8.** Chemical structures of n.13 binders from IDO1 structure 6AZW.

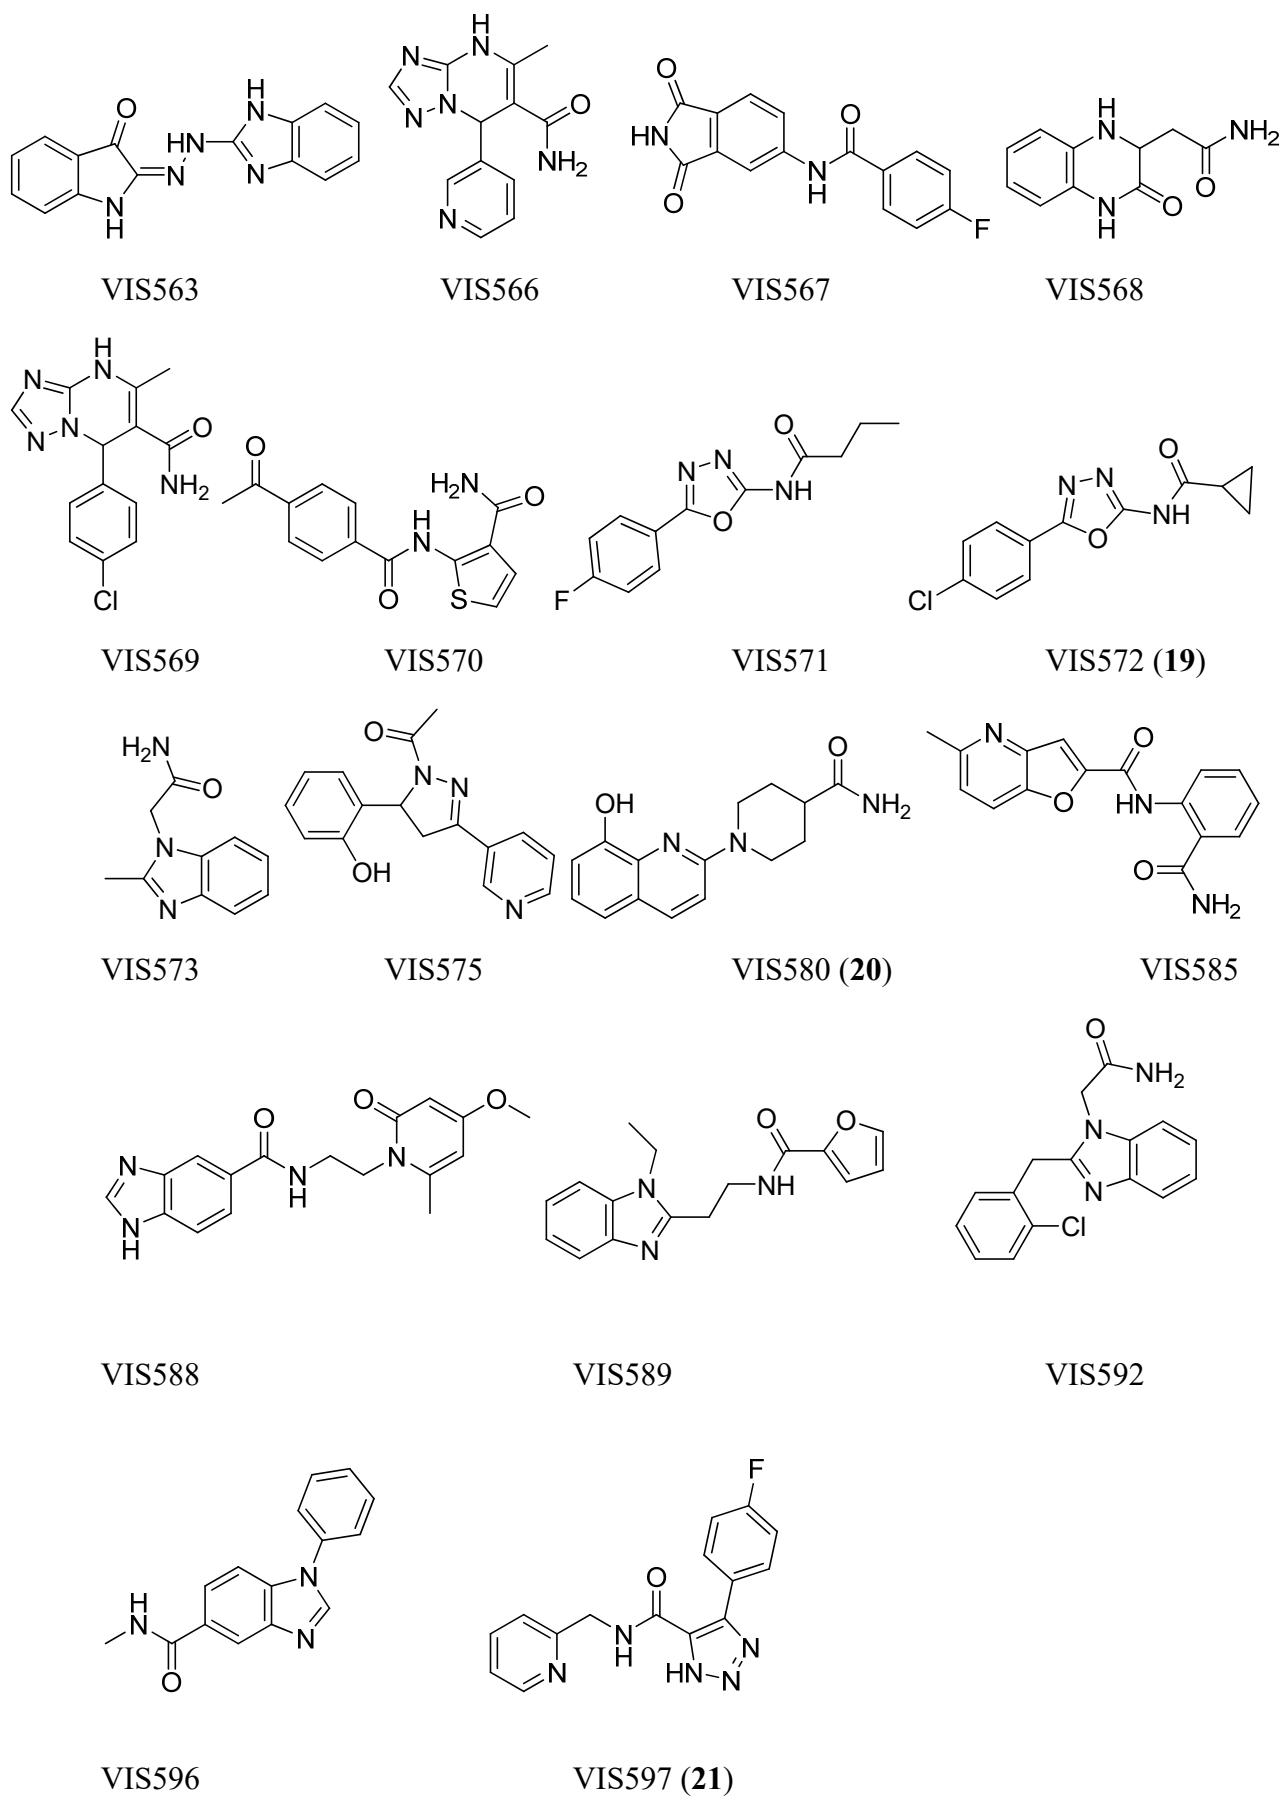

**Figure S9.** Chemical structures of n.17 binders from IDO1 structure 6E45.

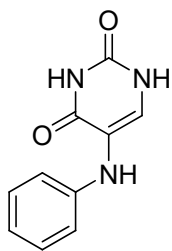

VIS562

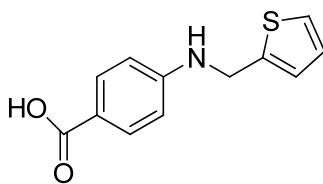

VIS564

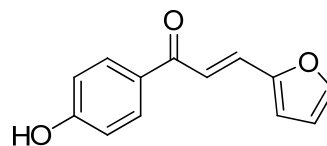

VIS574 (22)

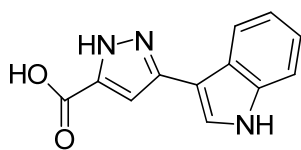

VIS593

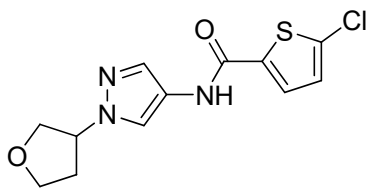

VIS600

**Figure S10.** Chemical structures of n.5 binders from IDO1 structure 6E46.
